# Supplementary material
Source: Research Square preprint supplement (doi:10.21203/rs.3.rs-9440534/v1)
Supplement: Supplementary file 1 [file 895d646e3ab49131f06387d6.docx]

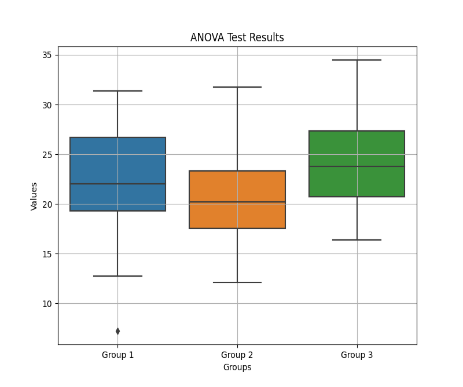

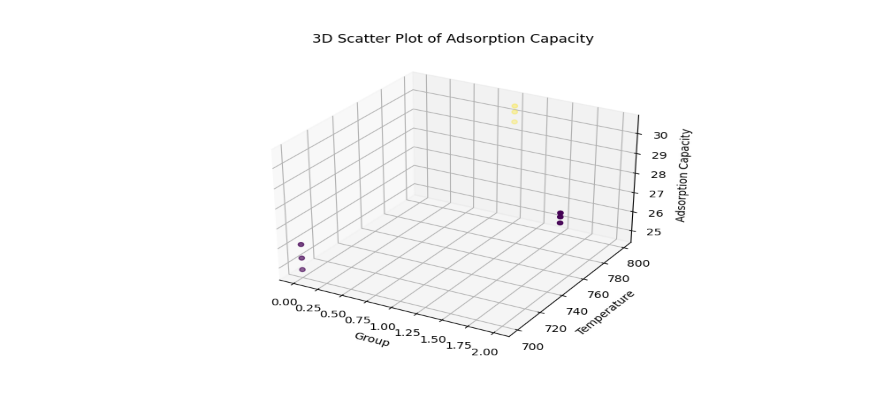


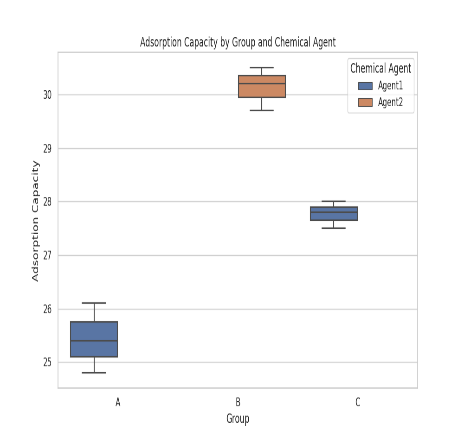


*Fig.1S. Supplementary for experimental design*


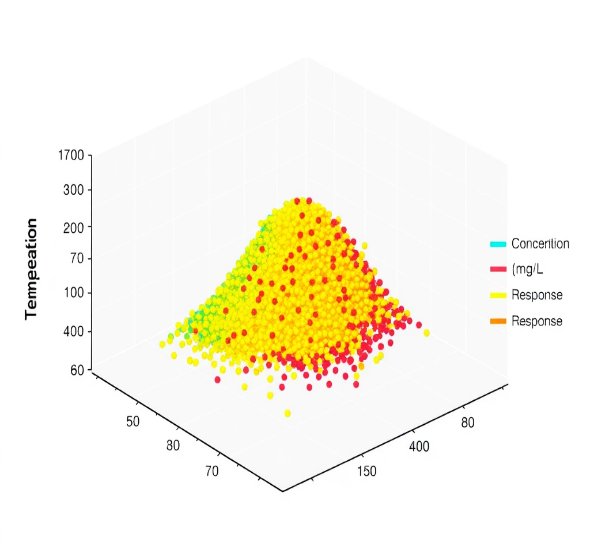

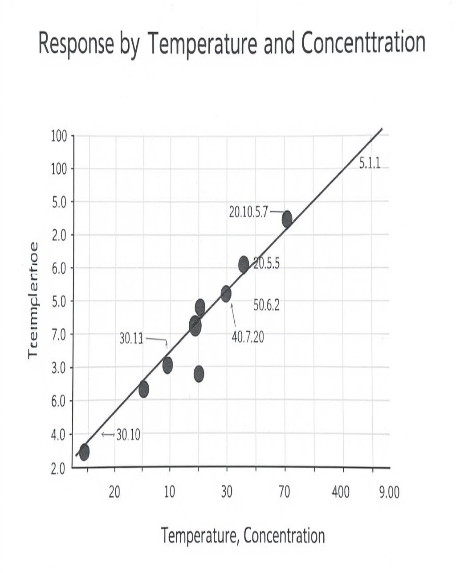

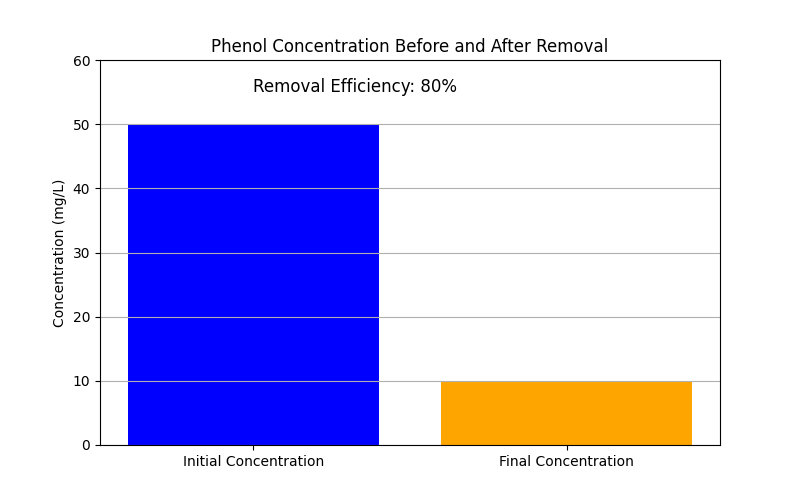


Fig.2S. The variation in adsorption capacity across different physical conditions-specifically temperature and initial concentration.
